# Supplementary material
Source: PubMed Central journal article supplement (PMC7051021)
Supplement: NIHMS1563035-supplement-2.pdf [file NIHMS1563035-supplement-2.pdf]

## Supplement Material-2

### Section 1: SpaTIL Feature Extraction

The whole-slide tissue scans for corresponding patients from D<sub>1</sub> (N=70) were obtained for extracting spatial tissue infiltrating lymphocytes features (SpaTIL) relating to (i) the spatial architecture of tissue infiltrating lymphocytes (TIL) clusters, (ii) co-localization of clusters of both TILs and cancer nuclei, and (iii) variation in density of TIL clusters across the tissue slide image.

**Identification of lymphocytes.** The first step in the process was to identify the spatial location of the TILs on digitized H&E stained images. The watershed algorithm was used to automatically detect nuclei. Once the nuclei were detected, a support vector machine using 7 image-derived features related to texture, shape, and color attributes of the segmented nuclei was used to classify the individual nuclei as corresponding either to TILs or to non-TILs.

#### **Quantitative evaluation of spatial arrangement of TILs.**

**Spatial TIL graph construction.** For extraction of SpaTIL features, sets of clusters of proximal TILs and non-TILs were identified. For this purpose, we represented the centroids of each of the individual TILs and non-TILs as nodes of a graph. Each node was connected to others based on a weighted Euclidean norm in which a weighting function favors the connectivity between proximal nodes. Using this process, we generated multiple subgraphs of TILs and non-TILs.

**SpaTIL features.** The first set of SpaTIL features comprised 20 features related to spatial arrangement of TILs, extracted from the TIL cluster graphs. These features included descriptors such as number of lymphocytes, ratio between area of TIL clusters and area of whole-slide images, and ratio between the number of TILs within the cluster and the cluster area. The second set included the ratio between the non-lymphocyte clusters to the closest lymphocyte clusters, intersection area of lymphocyte and non-lymphocyte, and a value indicating if the nearest cluster neighbor of a specific lymphocyte cluster is either lymphocyte or non-lymphocyte.

These features are listed in Table S4. We calculated Pearson's correlation coefficient between developed QuRiS and SpaTIL features.

## Section 2: Correlation coefficient for SpaTIL features and QuRiS

**Table S.4:** Pearson correlation coefficient of QuRiS with individual SpaTIL features using D1 cohort with N=70 patients.

| Idx | SpaTIL Feature                                                                                     | Correlation Coefficient | Idx | SpaTIL Feature                                         | Correlation Coefficient |
|-----|----------------------------------------------------------------------------------------------------|-------------------------|-----|--------------------------------------------------------|-------------------------|
| 1   | 'avg of ratio of the nuclei cluster density to its closest lym cluster cluster'                    | -0.068548217            | 48  | 'ratio of number of unique lym nodes to all lym nodes' | -0.116244702            |
| 2   | 'avg of ratio of the nuclei cluster density to its second closest lym cluster density'             | -0.150885109            | 49  | 'average distance of nuclei to nearest lym'            | -0.175162033            |
| 3   | 'avg of ratio of the nuclei cluster density to its third closest lym cluster density'              | -0.082589705            | 50  | 'lympTotArea'                                          | -0.194999154            |
| 4   | 'avg of ratio of the nuclei cluster density to its first three closest lym cluster mean density'   | 0.160823937             | 51  | 'lympAvgArea'                                          | -0.137579828            |
| 5   | 'std of ratio of the nuclei cluster density to its closest lym cluster cluster'                    | -0.028989277            | 52  | 'lympMedianArea'                                       | -0.008865348            |
| 6   | 'std of ratio of the nuclei cluster density to its second closest lym cluster density'             | -0.20681203             | 53  | 'lympStdArea'                                          | -0.089769515            |
| 7   | 'std of ratio of the nuclei cluster density to its third closest lym cluster density'              | -0.024038741            | 54  | 'lympModeArea'                                         | 0.058361397             |
| 8   | 'std of ratio of the nuclei cluster density to its first three closest lym cluster mean density'   | 0.135962339             | 55  | 'nonLymTotArea'                                        | 0.079192836             |
| 9   | 'var of ratio of the nuclei cluster density to its closest lym cluster cluster'                    | -0.008784743            | 56  | 'nonLymAvgArea'                                        | 0.001491959             |
| 10  | 'var of ratio of the nuclei cluster density to its second closest lym cluster density'             | -0.197582571            | 57  | 'nonLymMedianArea'                                     | 0.044094657             |
| 11  | 'var of ratio of the nuclei cluster density to its third closest lym cluster density'              | -0.024123586            | 58  | 'nonLymStdArea'                                        | -0.078023118            |
| 12  | 'var of ratio of the nuclei cluster density to its first three closest lym cluster mean density'   | 0.132752781             | 59  | 'nonLymModeArea'                                       | -0.08835839             |
| 13  | 'min of ratio of the nuclei cluster density to its closest lym cluster cluster'                    | -0.04774157             | 60  | 'lympTotDensity'                                       | -0.067530353            |
| 14  | 'min of ratio of the nuclei cluster density to its second closest lym cluster density'             | -0.194530973            | 61  | 'lympAvgDensity'                                       | -0.086611609            |
| 15  | 'min of ratio of the nuclei cluster density to its third closest lym cluster density'              | -0.196108574            | 62  | 'lympMedianDensity'                                    | -0.064898542            |
| 16  | 'min of ratio of the nuclei cluster density to its first three closest lym cluster mean density'   | 0.034175957             | 63  | 'lympStdDensity'                                       | 0.071426038             |
| 17  | 'max of ratio of the nuclei cluster density to its closest lym cluster cluster'                    | -0.024092555            | 64  | 'lympModeDensity'                                      | -0.034241092            |
| 18  | 'max of ratio of the nuclei cluster density to its second closest lym cluster density'             | -0.141794394            | 65  | 'nonLymTotDensity'                                     | 0.107552768             |
| 19  | 'max of ratio of the nuclei cluster density to its third closest lym cluster density'              | -0.156591248            | 66  | 'nonLymAvgDensity'                                     | -0.007827012            |
| 20  | 'max of ratio of the nuclei cluster density to its first three closest lym cluster mean density'   | 0.031379749             | 67  | 'nonLymMedianDensity'                                  | 0.220731128             |
| 21  | 'range of ratio of the nuclei cluster density to its closest lym cluster cluster'                  | -0.210614368            | 68  | 'nonLymStdDensity'                                     | 0.237694262             |
| 22  | 'range of ratio of the nuclei cluster density to its second closest lym cluster density'           | -0.141450778            | 69  | 'nonLymModeDensity'                                    | 0.032356646             |
| 23  | 'range of ratio of the nuclei cluster density to its third closest lym cluster density'            | 0.004059192             | 70  | 'intersectedArea'                                      | 0.023812444             |
| 24  | 'range of ratio of the nuclei cluster density to its first three closest lym cluster mean density' | -0.014271201            | 71  | 'avg1Nearest'                                          | -0.13938205             |
| 25  | 'avg of reciprocal of number of least lym cluster to encompass nuclei cluster'                     | 0.195204313             | 72  | 'median1Nearest'                                       | -0.021537739            |
| 26  | 'std of reciprocal of number of least lym cluster to encompass nuclei cluster'                     | 0.223889325             | 73  | 'mode1Nearest'                                         | -0.079029197            |
| 27  | 'var of reciprocal of number of least lym cluster to encompass nuclei cluster'                     | 0.16548175              | 74  | 'avg2Nearest'                                          | 0.108534514             |
| 28  | 'min of reciprocal of number of least lym cluster to encompass nuclei cluster'                     | -0.212727524            | 75  | 'median2Nearest'                                       | 0.029155776             |
| 29  | 'max of reciprocal of number of least lym cluster to encompass nuclei cluster'                     | -0.212670795            | 76  | 'mode2Nearest'                                         | 0.07753569              |
| 30  | 'range of reciprocal of number of least lym cluster to encompass nuclei cluster'                   | -0.209706821            | 77  | 'avg3Nearest'                                          | 0.19617502              |
| 31  | 'avg of area ratio of nuclei cluster to encompassed lym clusters'                                  | -0.115741545            | 78  | 'median3Nearest'                                       | 0.138335766             |
| 32  | 'std of area ratio of nuclei cluster to encompassed lym clusters'                                  | -0.097028858            | 79  | 'mode3Nearest'                                         | 0.164061198             |
| 33  | 'var of area ratio of nuclei cluster to encompassed lym clusters'                                  | -0.083277923            | 80  | 'avg4Nearest'                                          | 0.144128255             |
| 34  | 'min of area ratio of nuclei cluster to encompassed lym clusters'                                  | 0.028592185             | 81  | 'median4Nearest'                                       | -0.024208296            |
| 35  | 'max of area ratio of nuclei cluster to encompassed lym clusters'                                  | 0.055189072             | 82  | 'mode4Nearest'                                         | 0.153365785             |
| 36  | 'range of area ratio of nuclei cluster to encompassed lym clusters'                                | 0.070868536             | 83  | 'avg5Nearest'                                          | -0.061147535            |
| 37  | 'avg of density ratio of nuclei cluster to encompassed lym clusters'                               | 0.05082384              | 84  | 'median5Nearest'                                       | -0.082526071            |
| 38  | 'std of density ratio of nuclei cluster to encompassed lym clusters'                               | 0.14941434              | 85  | 'mode5Nearest'                                         | -0.06654644             |
| 39  | 'var of density ratio of nuclei cluster to encompassed lym clusters'                               | 0.21056833              |     |                                                        |                         |
| 40  | 'min of density ratio of nuclei cluster to encompassed lym clusters'                               | 0.239931268             |     |                                                        |                         |
| 41  | 'max of density ratio of nuclei cluster to encompassed lym clusters'                               | 0.247720455             |     |                                                        |                         |
| 42  | 'range of density ratio of nuclei cluster to encompassed lym clusters'                             | 0.0896348               |     |                                                        |                         |
| 43  | '1-norm of the vector by ratio of nucleiDegree to LymDegree'                                       | 0.141759087             |     |                                                        |                         |
| 44  | '1-norm of the vector by ratio of nucleiCloseness to LymCloseness'                                 | 0.220381499             |     |                                                        |                         |
| 45  | '1-norm of the vector by nucleiBetweenness minus LymBetweenness'                                   | 0.237424695             |     |                                                        |                         |
| 46  | '1-norm of the vector by ratio of nucleiEigenvector to LymEigenvector'                             | 0.235044918             |     |                                                        |                         |
| 47  | '1-norm of the vector by ratio of nucleiSumIndex to LymSumIndex'                                   | 0.10614462              |     |                                                        |                         |
